# Supplementary material
Source: publisher figshare collection journal article supplement (https://frontiersin.figshare.com/ndownloader/files/23740328)
Supplement: Supplementary file 1 [file 23740328]

**Supplementary figures.**

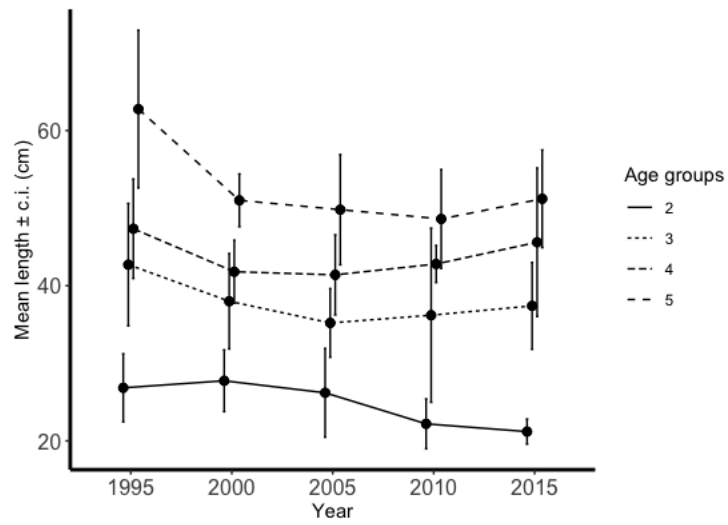

Figure S1. The length for the nominal age group 2-5 of the studied Baltic cod, collected in SD 25 in the Baltic Sea.

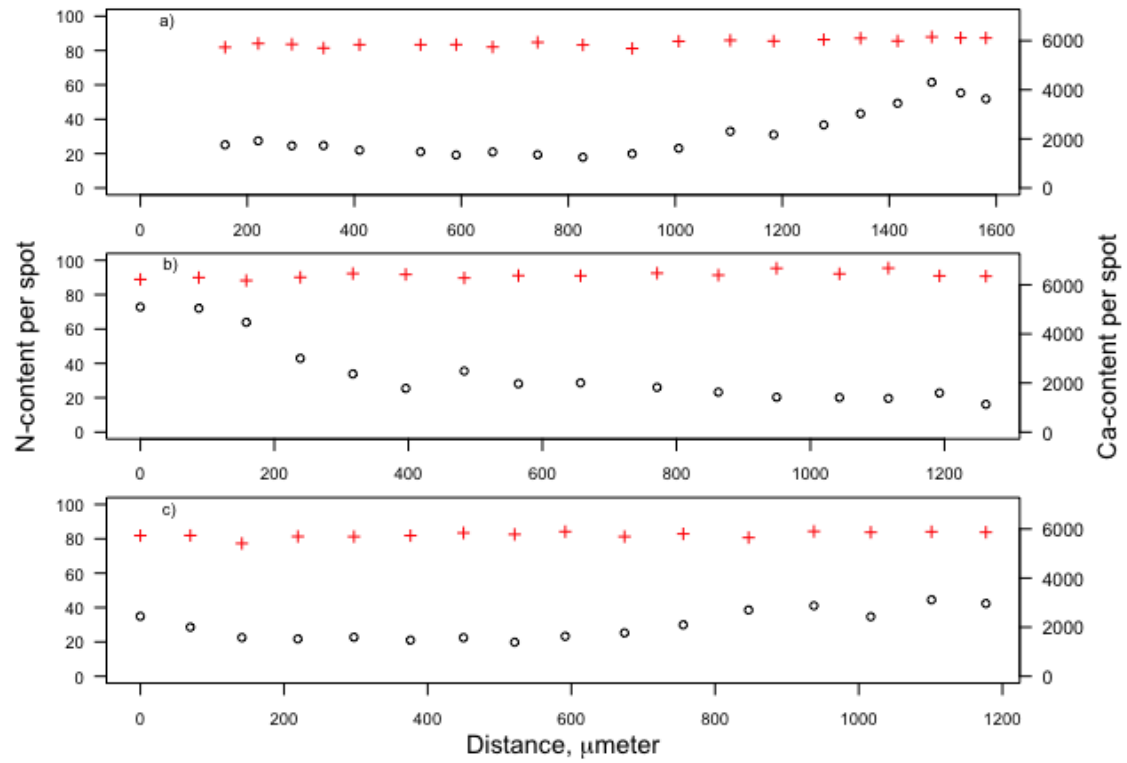

Figure S2. Examples on estimation in three otoliths of N-content (y-axis on the left) and Ca-content (y-axis on the right) by the distance from the otolith core ( $\mu\text{m}$ ). a) Preparation number 32, a) Preparation number 45, c) Preparation number 79 (for supplementary information, see Table S3).

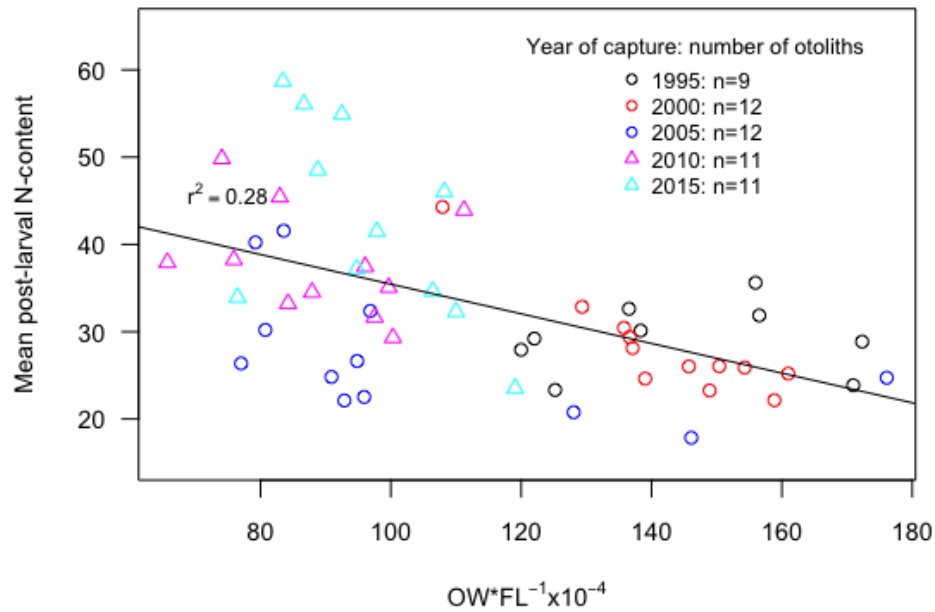

Figure S3. Scatter plot of the mean post-larval N-content by year *versus* the relative otolith size (otolith width/ fish length) for all cod included in the study. A linear regression line is fitted to the data ( $p < 0.001$ ,  $r^2 = 0.28$ ). Year of capture: Black points – 1995, red points – 2000, blue points – 2005, pink triangles – 2010, light blue triangles – 2015.
